# Supplementary material for: The Membrane Fusion Step of Vaccinia Virus Entry Is Cooperatively Mediated by Multiple Viral Proteins and Host Cell Components
Source: PubMed Central journal article supplement (PMC3240603; doi:10.1371/journal.ppat.1002446), 2011-12-15

**A**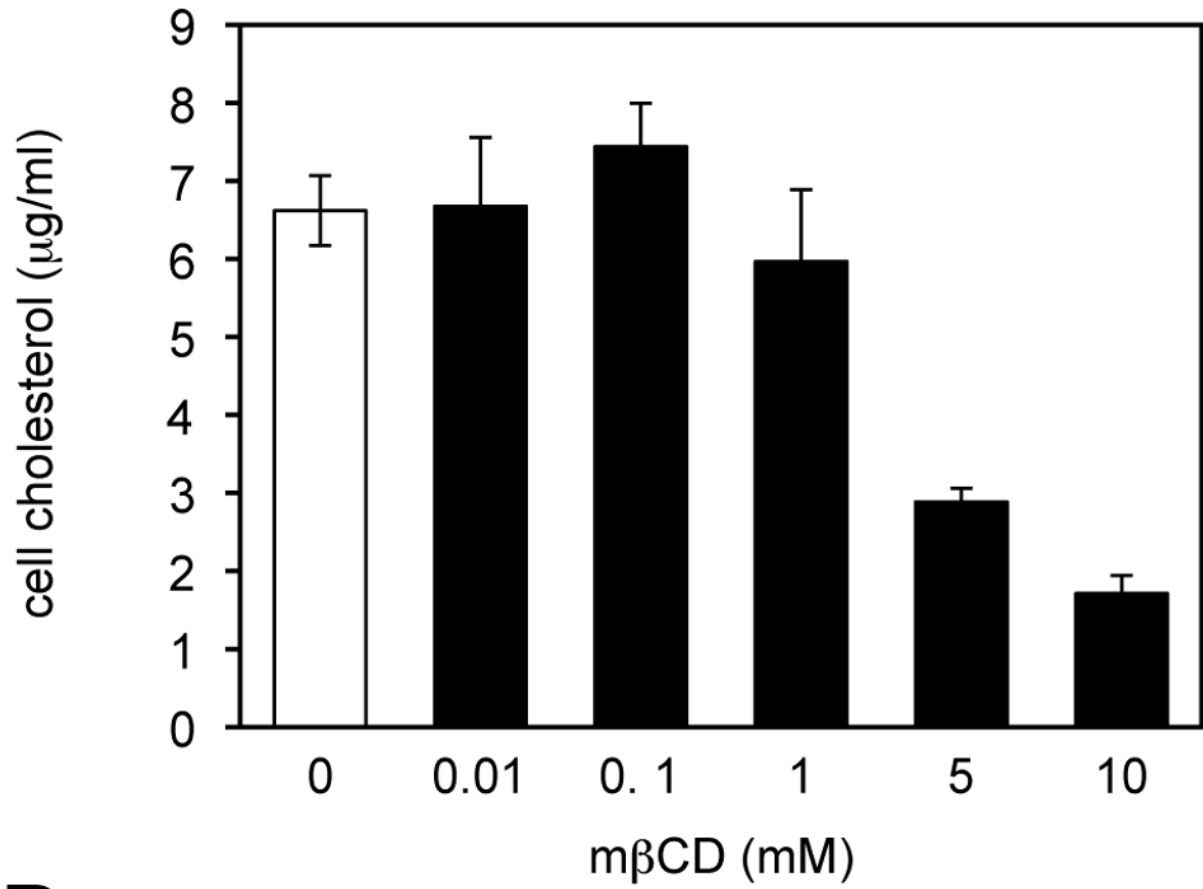**B**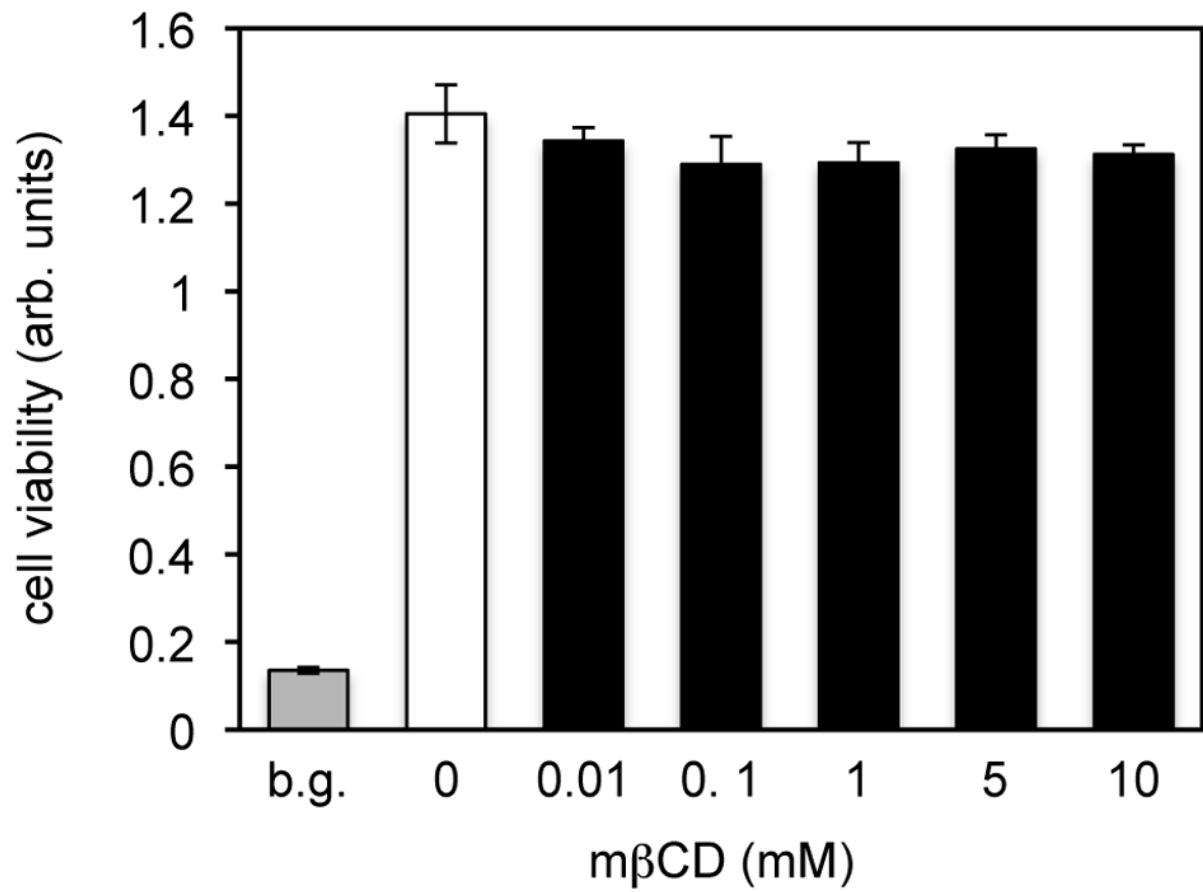

Supplement: ppat.1002446.s001.pdf [file ppat.1002446.s001.pdf]
